# Supplementary material
Source: Elsevier journal article supplement (https://www.sciencedirect.com/science/article/pii/S0210480620300759)
Supplement: mmc1 [file S0210480620300759:mmc1.pdf]

**Supplementary file**

**Suprapubic Catheter Exchange Model Assessment Questionnaire**

Questionnaire to evaluate and validate the realism and usefulness of a suprapubic change model for Urological training (**1 – Very poor**, 2- Poor, 3 – Neutral, 4 – Good, **5 – Excellent**)

**1. Your position** ST\*3-4 /ST5-7 /Consultant

**2. How many suprapubic catheters have you replaced?**

<0                      <5                      5 – 10                      11 – 30                      >50

**3. How many suprapubic catheters have you inserted over a guidewire?**

<0                      <5                      5 – 10                      11 – 30

|                                                                      |   |   |   |   |
|----------------------------------------------------------------------|---|---|---|---|
| Overall <b>appearance</b> of the suprapubic tract site               |   |   |   |   |
| 1                                                                    | 2 | 3 | 4 | 5 |
| Representation of the <b>relevant anatomy</b> to teach the procedure |   |   |   |   |
| 1                                                                    | 2 | 3 | 4 | 5 |
| The <b>ease of insertion</b> of a guidewire through the tract        |   |   |   |   |
| 1                                                                    | 2 | 3 | 4 | 5 |
| The <b>feel of tract</b> dilatation using ISC catheters/dilators     |   |   |   |   |
| 1                                                                    | 2 | 3 | 4 | 5 |
| The <b>ability to insert</b> a catheter over a guidewire             |   |   |   |   |
| 1                                                                    | 2 | 3 | 4 | 5 |
| The <b>overall ability</b> for the model to simulate the task        |   |   |   |   |
| 1                                                                    | 2 | 3 | 4 | 5 |

**4. The model would be useful for training junior doctors**

Strongly disagree    Disagree    Neutral    Agree    Strongly agree

\*Specialty Trainee, ISC – Intermittent Self Catheterisation
